# Supplementary material for: When Being Hot Is Not Cool: Monitoring Hot Lists for Information Security
Source: Atypon-hosted journal article supplement (doi:10.1287/isre.2016.0677), 2016-11-29
Supplement: isre.2016.0677-sm.pdf [file isre.2016.0677-sm.pdf]

Online Appendix to **When Being Hot is Not Cool: Monitoring Hot Lists for Information Security**

**Proof of Proposition 1**

By closely examining the differential equation (3) and the boundary condition (6), we can propose the following separable solution form

$$f(x_1, \dots, x_n) = \prod_{i=1}^{n-1} g(x_i)g_1(x_n). \quad (52)$$

Such a form is symmetric in  $x_i, i = 1, \dots, n-1$ , but not in  $x_n$  as we can see from Equation (6). Then plugging (52) into (3) and (6), we can get the differential equations that  $g$  and  $g_1$  should satisfy:

$$\frac{\partial g(x)}{\partial x} = -\theta(x)g(x) \quad (53)$$

$$\frac{\partial g_1(x)}{\partial x} = -(\lambda + \theta(x))g_1(x) \quad (54)$$

and the boundary conditions:

$$g(0)g_1(x_n) = \int_0^{x_n} \theta(x_i)g(x_i)g_1(x_n)dx_i + \int_{x_n}^{\infty} (\lambda + \theta(x))g(x_n)g_1(x)dx \quad (55)$$

It is easy to verify that the following proposed solutions

$$g(x) = c_1 e^{-\phi(x)}, \quad g_1(x) = c_2 e^{-(\lambda x + \phi(x))} \quad (56)$$

with  $\phi(x) = \int_0^x \theta(y)dy$  satisfies the differential equations (53) and (54). Furthermore, the right-hand side of the boundary condition (55) is

$$c_1(1 - e^{-\phi(x_n)})c_2 e^{-(\lambda x_n + \phi(x_n))} + c_1 e^{-\phi(x_n)}c_2 e^{-(\lambda x_n + \phi(x_n))} = c_1 c_2 e^{-(\lambda x_n + \phi(x_n))} \quad (57)$$

which equals the left-hand side of (55). Therefore, (56) satisfy (53) and (54) and the boundary condition (55) and are the solution we are looking for. Then (52) can be rewritten as

$$f(x_1, x_2, \dots, x_n) = e^{-\left[\lambda x_n + \sum_{i=1}^n \phi(x_i)\right]} / \omega \quad (58)$$

where  $\omega$  is the normalization factor:

$$\omega = \int_0^{\infty} dx_n e^{-(\lambda x_n + \phi(x_n))} \left[ \int_0^{x_n} dx e^{-\phi(x)} \right]^{n-1} \quad (59)$$

□

**Proof of Lemma 1:**

First from (11), we can get

$$\begin{aligned} \int_0^{x_n} \theta(x) dx e^{-\phi(x)} &= \int_0^{x_n} d\phi(x) e^{-\phi(x)} \\ &= 1 - e^{-\phi(x_n)} = 1 - \left( \frac{\alpha x_n + \beta}{\beta} \right)^{-\frac{1}{\alpha}} \end{aligned} \quad (60)$$

Plugging (7) into (15), we get:

$$\begin{aligned} H &= \int_0^\infty dx_n \int_0^{x_n} dx_{n-1} \dots \int_0^{x_n} dx_1 f(x_1, x_2, \dots, x_n) \sum_{i=1}^n \theta(x_i) \\ &= \int_0^\infty dx_n \int_0^{x_n} dx_{n-1} \dots \int_0^{x_n} dx_1 e^{-\left[ \lambda x_n + \sum_{i=1}^n \phi(x_i) \right]} / \omega \sum_{i=1}^n \theta(x_i) \\ &= \int_0^\infty dx_n \int_0^{x_n} dx_{n-1} \dots \int_0^{x_n} dx_1 e^{-\sum_{i=1}^{n-1} \phi(x_i)} \left[ \sum_{i=1}^{n-1} \theta(x_i) + \theta(x_n) \right] e^{-(\lambda x_n + \phi(x_n))} / \omega \\ &= \int_0^\infty dx_n \left[ (n-1) \left( \int_0^{x_n} \theta(x) e^{-\phi(x)} dx \right) \left( \int_0^{x_n} e^{-\phi(x)} dx \right)^{n-2} + \theta(x_n) \left( \int_0^{x_n} e^{-\phi(x)} dx \right)^{n-1} \right] e^{-(\phi(x_n) + \lambda x_n)} / \omega \\ &= \int_0^\infty dx_n \left( \int_0^{x_n} e^{-\phi(x)} dx \right)^{n-2} \left[ (n-1) \int_0^{x_n} \theta(x) e^{-\phi(x)} dx + \theta(x_n) \int_0^{x_n} e^{-\phi(x)} dx \right] e^{-(\phi(x_n) + \lambda x_n)} / \omega \end{aligned} \quad (61)$$

Plugging (10), (11) and (60) into the above equation (61), we can get

$$\begin{aligned} H &= \int_0^\infty dx_n \left\{ \frac{\beta}{1-\alpha} \left[ 1 - \left( \frac{\alpha x_n + \beta}{\beta} \right)^{1-\frac{1}{\alpha}} \right] \right\}^{n-2} \\ &\quad \times \left\{ (n-1) \left[ 1 - \left( \frac{\alpha x_n + \beta}{\beta} \right)^{-\frac{1}{\alpha}} \right] + \theta(x_n) \frac{\beta}{1-\alpha} \left[ 1 - \left( \frac{\alpha x_n + \beta}{\beta} \right)^{1-\frac{1}{\alpha}} \right] \right\} \\ &\quad \times e^{-\lambda x_n} \left( \frac{\alpha x_n + \beta}{\beta} \right)^{-\frac{1}{\alpha}} / \omega \end{aligned} \quad (62)$$

where  $\omega$  is given in (13).

By transformation of variable  $y = \frac{\alpha x_n + \beta}{\beta}$ , we can get the final expression of  $H$  in (16).  $\square$

**Proof of Proposition 2:**

Let  $Y$  be the value of  $y$  that yields the peak of  $g_n(y)$ . By using the peak approximation, we can approximate the integrations in (16) by simply evaluating the integrands at  $y = Y$ :

$$\begin{aligned}
H &= \frac{1-\alpha}{\beta} \frac{\int_1^\infty dy g_{n-1}(y) \left[ (n-1) \left( 1 - y^{-\frac{1}{\alpha}} \right) + \frac{1}{1-\alpha} \frac{1}{y} \left( 1 - y^{1-\frac{1}{\alpha}} \right) \right]}{\int_1^\infty dy g_n(y)} \\
&= \frac{1-\alpha}{\beta} \frac{g_{n-1}(y) \left[ (n-1) \left( 1 - y^{-\frac{1}{\alpha}} \right) + \frac{1}{1-\alpha} \frac{1}{y} \left( 1 - y^{1-\frac{1}{\alpha}} \right) \right]}{g_n(y)} \Big|_{y=Y} \\
&= \frac{1-\alpha}{\beta} \frac{1}{1 - Y^{1-\frac{1}{\alpha}}} \left[ (n-1) \left( 1 - Y^{-\frac{1}{\alpha}} \right) + \frac{1}{1-\alpha} \frac{1}{Y} \left( 1 - Y^{1-\frac{1}{\alpha}} \right) \right]
\end{aligned} \tag{63}$$

where we have used the expression of  $g_n(y)$  in (19) in the last step.

The value of  $Y$  satisfies the first-order condition of  $dg_n(y)/dy = 0|_{y=Y} = dLn[g_n(y)]/dy = 0|_{y=Y}$ . From (19), we can have

$$\begin{aligned}
0 &= \frac{d}{dy} \left( -\frac{\beta\lambda}{\alpha} y - \frac{1}{\alpha} Ln[y] + (n-1)Ln[Y^{1-\frac{1}{\alpha}} - 1] \right) \Big|_{y=Y} \\
&= -\frac{\beta\lambda}{\alpha} - \frac{1}{\alpha Y} + (n-1) \frac{(1 - \frac{1}{\alpha})Y^{-\frac{1}{\alpha}}}{Y^{1-\frac{1}{\alpha}} - 1} \\
&= -\frac{\beta}{\alpha} \left( \lambda + \frac{1}{\beta Y} \right) + \frac{(n-1)(\alpha-1)/\alpha}{Y - Y^{\frac{1}{\alpha}}}
\end{aligned} \tag{64}$$

Rearranging the above equation, we can get Equation (21).

Then we can use Equation (21) to further simplify the expression of  $H$  in Equation (63):

$$\begin{aligned}
H &= \frac{(1-\alpha)(n-1)}{\beta(Y^{\frac{1}{\alpha}} - Y)} (Y^{\frac{1}{\alpha}} - 1) + \frac{1}{\beta Y} \\
&= \left( \lambda + \frac{1}{\beta Y} \right) (Y^{\frac{1}{\alpha}} - 1) + \frac{1}{\beta Y} \\
&= -\lambda + \left( \lambda + \frac{1}{\beta Y} \right) Y^{\frac{1}{\alpha}}
\end{aligned} \tag{65}$$

which is Equation (20). We shall have  $Y > 1$  for  $H$  in (65) to be positive.  $\square$

**Proof of Lemma 2:**

First, under the high traffic assumption, we shall have  $\lambda \gg 1/(\beta Y)$  since  $Y > 1$ . Then (21) can be simplified as (22). We can get the expression of  $\frac{\partial Y}{\partial n}$  from (22):

$$\frac{\partial Y}{\partial n} = \frac{1}{\frac{1}{\alpha} Y^{\frac{1}{\alpha}-1} - 1} \frac{1-\alpha}{\beta\lambda} \tag{66}$$

and we have  $\frac{\partial Y}{\partial n} > 0$  since  $Y > 1$ .

Plugging (66) into (25), the first-order condition (FOC)  $\frac{\partial J}{\partial n} = 0$ , we can obtain:

$$\frac{\partial J}{\partial n} = c_a P \frac{1}{\alpha} Y^{\frac{1}{\alpha}-1} \frac{1}{\frac{1}{\alpha} Y^{\frac{1}{\alpha}-1} - 1} \frac{1-\alpha}{\beta} - c_0 = 0. \quad (67)$$

which can be rewritten as:

$$\frac{\partial J}{\partial n} = c_a P \frac{1-\alpha}{\beta} \left( 1 + \frac{1}{\frac{1}{\alpha} Y^{\frac{1}{\alpha}-1} - 1} \right) - c_0 = 0.$$

Then,

$$\begin{aligned} \frac{\partial^2 J}{\partial n^2} &= c_a P \frac{1-\alpha}{\beta} (-1) \frac{\frac{1}{\alpha} (\frac{1}{\alpha} - 1) Y^{\frac{1}{\alpha}-2}}{(\frac{1}{\alpha} Y^{\frac{1}{\alpha}-1} - 1)^2} \frac{\partial Y}{\partial n} \\ &= (-1) c_a P \frac{1}{\beta} \frac{(\frac{1}{\alpha} - 1)^2 Y^{\frac{1}{\alpha}-2}}{(\frac{1}{\alpha} Y^{\frac{1}{\alpha}-1} - 1)^2} \frac{\partial Y}{\partial n} \\ &< 0 \end{aligned} \quad (68)$$

□

### Proof of Proposition 3:

Solving for Y from (67) derived in Lemma 2, we can get:

$$Y = A^\alpha, \quad A \equiv \left[ \frac{c_0 \alpha \beta}{c_0 \beta - c_a P (1 - \alpha)} \right]^{1/(1-\alpha)}. \quad (69)$$

Then we can get  $n$  from (22):

$$n = 1 + \frac{\beta \lambda}{1 - \alpha} (A - A^\alpha). \quad (70)$$

□

### Proof of Corollary 1:

From the expression of  $n$  given in Equation (27), we can get:

$$\frac{\partial n}{\partial c_0} = \frac{\beta \lambda}{1 - \alpha} (1 - \alpha A^{\alpha-1}) \frac{\partial A}{\partial c_0} \quad (71)$$

The first two terms on the right-hand side of the above equation (71) are positive since  $\alpha < 1$

and  $A > 1$ . From (69) we can get the expression of  $\frac{\partial A}{\partial c_0}$ :

$$\begin{aligned}\frac{\partial A}{\partial c_0} &= A \frac{\partial \ln[A]}{\partial c_0} \\ &= A \left( -\frac{1}{1-\alpha} \frac{1}{\beta - \frac{c_a P(1-\alpha)}{c_0}} \frac{c_a P(1-\alpha)}{c_0^2} \right) \\ &= -A \frac{1}{1-\alpha} \frac{1}{c_0 \beta - c_a P(1-\alpha)} \frac{c_a P(1-\alpha)}{c_0} < 0\end{aligned}$$

since  $c_0 \beta - c_a P(1-\alpha) > 0$  and  $\alpha < 1$ . Therefore, we have:

$$\frac{\partial n}{\partial c_0} < 0 \quad (72)$$

Furthermore, from Equation (22) and the FOC (67), we can see that  $n$  and  $\lambda$  affect  $\frac{\partial J}{\partial n}$  only through  $Y$  by a combination of  $(n-1)/\lambda$ , i.e., the FOC (67) can be expressed as  $\frac{\partial J}{\partial n}(n, \lambda) = \frac{\partial J}{\partial n}(Y(\frac{n-1}{\lambda}))$ . Then, we have

$$\frac{\partial^2 J}{\partial n \partial \lambda}(Y(\frac{n-1}{\lambda})) = \frac{\partial^2 J}{\partial n \partial Y} Y' \frac{-(n-1)}{\lambda^2} = \frac{-(n-1)}{\lambda} \frac{\partial^2 J}{\partial n^2}. \quad (73)$$

By using the Envelope Theorem (Korn and Korn 2000), we can determine the sign of  $\frac{\partial n}{\partial \lambda}$ :

$$\frac{\partial n}{\partial \lambda} = -\frac{\partial^2 J}{\partial n \partial \lambda} / \frac{\partial^2 J}{\partial n^2} = \frac{n-1}{\lambda} > 0. \quad (74)$$

□

**Derivation of FOC  $\frac{\partial J}{\partial P_f} = 0$  in Equation (33):**

First, using the high traffic assumption  $\lambda \gg 1/\beta$ , we can simplify  $H$  in Equation (20) as

$$H = \lambda(Y^{\frac{1}{\alpha}} - 1) \quad (75)$$

Then, from the expressions of  $\lambda$  and  $P$  given in Equations (28) and (29), we can rewrite the objective function of (30) as

$$\max_{n, P_f} J = \max_{n, P_f} (c_a \lambda_0 P_0 P_d (Y^{\frac{1}{\alpha}} - 1) - c_0 n) \quad (76)$$

Now we can write the FOC  $\frac{\partial J}{\partial P_f} = 0$  as

$$\frac{\partial J}{\partial P_f} = c_a \lambda_0 P_0 \left[ q P_f^{q-1} (Y^{\frac{1}{\alpha}} - 1) + P_d \frac{\partial}{\partial P_f} Y^{\frac{1}{\alpha}} \right] = 0 \quad (77)$$

Also under the high traffic assumption, we can rewrite Equation (21) as:

$$\lambda(Y^{\frac{1}{\alpha}} - Y) = \lambda \left( Y^{\frac{1}{\alpha}} - (Y^{\frac{1}{\alpha}})^{\alpha} \right) = \frac{(n-1)(1-\alpha)}{\beta} \quad (78)$$

Taking the derivative of the above equation (78) with respect to  $P_f$ , we can get:

$$\left(1 - \alpha Y^{\frac{\alpha-1}{\alpha}}\right) \frac{\partial}{\partial P_f} Y^{\frac{1}{\alpha}} - Y \text{Ln}[Y^{\frac{1}{\alpha}}] \frac{\partial \alpha}{\partial P_f} = (n-1) \frac{\partial}{\partial P_f} \frac{(1-\alpha)}{\beta \lambda} \quad (79)$$

from which we can get the expression of  $\frac{\partial}{\partial P_f} Y^{\frac{1}{\alpha}}$ :

$$\frac{\partial}{\partial P_f} Y^{\frac{1}{\alpha}} = \frac{1}{1 - \alpha Y^{\frac{\alpha-1}{\alpha}}} \left[ (n-1) \frac{\partial}{\partial P_f} \frac{1-\alpha}{\beta \lambda} + Y \text{Ln}[Y^{\frac{1}{\alpha}}] \frac{\partial \alpha}{\partial P_f} \right]. \quad (80)$$

Plugging it into (77), we get Equation (33).  $\square$

**Proof of Lemma 3:**

Optimal decision variables of  $n^*$  and  $P_f^*$  are determined by two FOCs in (25) and (33) respectively with  $Y$  defined in Equation (22). By transformation of variable  $m = (n-1)/\lambda_0$ , we have two new decision variables satisfying the following modified FOCs:

$$c_a P_d P_0 \frac{1}{\alpha} Y^{\frac{1}{\alpha}-1} \frac{\partial Y}{\partial m} - c_0 = 0. \quad (81)$$

$$q P_f^{q-1} (Y^{\frac{1}{\alpha}} - 1) + P_d \frac{1}{1 - \alpha Y^{\frac{\alpha-1}{\alpha}}} \left[ m \frac{\partial}{\partial P_f} \frac{1-\alpha}{\beta (P_d P_0 + P_f (1 - P_0))} + Y \text{Ln}[Y^{\frac{1}{\alpha}}] \frac{\partial \alpha}{\partial P_f} \right] = 0. \quad (82)$$

and  $Y$  is now given by:

$$(Y^{\frac{1}{\alpha}} - Y) = \frac{m(1-\alpha)}{(P_d P_0 + P_f (1 - P_0)) \beta} \quad (83)$$

Since none of the three equations (81) – (83) contains parameter  $\lambda_0$ , we conclude that  $\partial P_f^*/\partial \lambda_0 = 0$  and  $\partial m^*/\partial \lambda_0 = 0$  that is equivalent to  $(n^* - 1)/\lambda_0 = \text{constant}$ .  $\square$

**Proof of Proposition 4:**

To perform comparative static analysis, we start with the FOCs  $\frac{\partial J}{\partial n} = 0$  and  $\frac{\partial J}{\partial P_f} = 0$  which are given in (25) and (33) respectively. We can derive the following set of equations:

$$\frac{\partial}{\partial c_0} \frac{\partial J}{\partial P_f} = \frac{\partial^2 J}{\partial P_f^2} \frac{\partial P_f}{\partial c_0} + \frac{\partial^2 J}{\partial P_f \partial n} \frac{\partial n}{\partial c_0} + \frac{\partial^2 J}{\partial P_f \partial c_0} = 0 \quad (84)$$

$$\frac{\partial}{\partial c_0} \frac{\partial J}{\partial n} = \frac{\partial^2 J}{\partial P_f \partial n} \frac{\partial P_f}{\partial c_0} + \frac{\partial^2 J}{\partial n^2} \frac{\partial n}{\partial c_0} + \frac{\partial^2 J}{\partial n \partial c_0} = 0 \quad (85)$$

Then from (84) and (85) we can solve for  $\frac{\partial P_f}{\partial c_0}$  and  $\frac{\partial n}{\partial c_0}$  and get:

$$\frac{\partial P_f^*}{\partial c_0} = - \begin{vmatrix} \frac{\partial^2 J}{\partial P_f \partial c_0} & \frac{\partial^2 J}{\partial P_f \partial n} \\ \frac{\partial^2 J}{\partial n \partial c_0} & \frac{\partial^2 J}{\partial n^2} \end{vmatrix} / D, \quad \frac{\partial n^*}{\partial c_0} = - \begin{vmatrix} \frac{\partial^2 J}{\partial P_f^2} & \frac{\partial^2 J}{\partial P_f \partial c_0} \\ \frac{\partial^2 J}{\partial P_f \partial n} & \frac{\partial^2 J}{\partial n \partial c_0} \end{vmatrix} / D. \quad (86)$$

where the determinant of the Hessian matrix is given by

$$D = \begin{vmatrix} \frac{\partial^2 J}{\partial P_f^2} & \frac{\partial^2 J}{\partial P_f \partial n} \\ \frac{\partial^2 J}{\partial P_f \partial n} & \frac{\partial^2 J}{\partial n^2} \end{vmatrix}.$$

For  $n^*$  and  $P_f^*$  to maximize the objective function  $J$ , the related Hessian matrix at this point should be negative definite (Korn and Korn 2000), i.e.,  $\frac{\partial^2 J}{\partial n^2} < 0$ ,  $\frac{\partial^2 J}{\partial P_f^2} < 0$ , and  $D > 0$ .

From the first order conditions (25) and (33), we can get

$$\frac{\partial^2 J}{\partial P_f \partial c_0} = 0, \quad \frac{\partial^2 J}{\partial n \partial c_0} = -1. \quad (87)$$

Then plugging the above equation (87) in to (86) we can get the expression of  $\frac{\partial n^*}{\partial c_0}$ :

$$\frac{\partial n^*}{\partial c_0} = \frac{\partial^2 J}{\partial P_f^2} / D < 0 \quad (88)$$

since the related Hessian matrix is negative definite.

Similarly, we can get the expression of  $\frac{\partial P_f^*}{\partial c_0}$  from (86):

$$\frac{\partial P_f^*}{\partial c_0} = - \frac{\partial^2 J}{\partial P_f \partial n} / D. \quad (89)$$

Using (25), we can get:

$$\begin{aligned} \frac{1}{c_a \lambda_0 P_0} \frac{\partial^2 J}{\partial P_f \partial n} &= \frac{\partial}{\partial P_f} \left( P_d \frac{\partial Y^{1/\alpha}}{\partial n} \right) \\ &= q P_f^{q-1} \frac{\partial Y^{1/\alpha}}{\partial n} + P_d \frac{\partial}{\partial P_f} \frac{\partial Y^{1/\alpha}}{\partial n} \\ &= q P_f^{q-1} \frac{\partial Y^{1/\alpha}}{\partial n} + P_d \frac{\partial}{\partial P_f} \left( \frac{1-\alpha}{\beta \lambda} \frac{1}{1-\alpha Y^{\frac{\alpha-1}{\alpha}}} \right) \end{aligned} \quad (90)$$

where we have used (22) to derive the expression of  $\partial Y^{1/\alpha}/\partial n$  and plug it in the last step.

Given the complexity of (90), we have to make some approximation in order to derive analytical results. Assume that  $a$  is small and we can ignore the terms of  $\partial\alpha/\partial P_f$  and  $\partial\beta/\partial P_f$  in (90). Then the last term in (90) can be shown as:

$$\frac{\partial}{\partial P_f} \left( \frac{1-\alpha}{\beta\lambda} \frac{1}{1-\alpha Y^{\frac{\alpha-1}{\alpha}}} \right) = \frac{1}{1-\alpha Y^{\frac{\alpha-1}{\alpha}}} \frac{-(1-\alpha)}{\beta\lambda^2} \frac{d\lambda}{dP_f} \left[ 1 + \frac{(1-\alpha)}{\beta\lambda} \frac{\alpha(\alpha-1)}{(1-\alpha Y^{\frac{\alpha-1}{\alpha}})^2} Y^{\frac{\alpha-2}{\alpha}} (n-1) \right] \quad (91)$$

after we have used (80) and ignored the terms of  $\partial\alpha/\partial P_f$  and  $\partial\beta/\partial P_f$ . The right-hand side of Equation (91) is negative since  $d\lambda/dP_f$  is positive from (29).

Using the FOC in (25), we can get the expression of  $\frac{\partial Y^{1/\alpha}}{\partial n}$ . Plugging  $\frac{\partial Y^{1/\alpha}}{\partial n}$  and (91) into (90), we can get

$$\begin{aligned} \frac{1}{c_a \lambda_0 P_0} \frac{\partial^2 J}{\partial P_f \partial n} &= q P_f^{q-1} \frac{c_0}{c_a \lambda_0 P_0 P_d} \\ &- P_d \frac{1}{1-\alpha Y^{\frac{\alpha-1}{\alpha}}} \frac{1-\alpha}{\beta\lambda^2} \frac{d\lambda}{dP_f} \left[ 1 + \frac{(1-\alpha)}{\beta\lambda} \frac{\alpha(\alpha-1)}{(1-\alpha Y^{\frac{\alpha-1}{\alpha}})^2} Y^{\frac{\alpha-2}{\alpha}} (n-1) \right] \quad (92) \end{aligned}$$

If  $c_0$  is sufficiently small, then the right-hand side of (92) is negative. Otherwise, it is positive. Let the switching point to be  $\bar{c}_0$ . Then  $\frac{\partial P_f^*}{\partial c_0}$  in (89) is positive if  $c_0 < \bar{c}_0$  and negative otherwise.  $\square$

### Pseudo Code for Simulation:

The following is the pseudo code:

#### 1. Initialization

- (a) Define a *HotList* (of type SortedList) that stores sessions (of type Class) sorted by time a session is added to this list.
- (b) Add a session to *HotList*

#### 2. Run the Simulation

While *NumSuspiciousEvents* detected  $<$  *MaxNumEvents* to detect:

- (a) If *NumSuspiciousEvents* detected = *NumEvents\_WarmUp*  
Record statistics such as *ClockTime\_WarmUp*.
- (b) Record *minimumTime* of the following times and the corresponding *actionType*:
  - Time to switch to a different state of MMPP process
  - Time for a new session to arrive
  - Earliest time for a suspicious event to happen in *HotList*
  - Earliest death time for sessions in *HotList*

- Time to drop the oldest session in HotList (for an  $(n, \tau)$  policy)
- (c) Advance the system by time increment  $minimumTime$ :
- Adjust all the relevant times
  - Take action according to  $actionType$ 
    - State switching: set a new session arrival rate and  $time\_to\_switch$
    - Session arrival: add a random number of new sessions to HotList and drop the same number of oldest sessions from HotList
    - New suspicious event from a session: Reset this session’s age to be zero and increment  $NumSuspiciousEvents$
    - Session death: Remove this session from HotList
    - Session age passing  $\tau$ : Remove this session from HotList (for an  $(n, \tau)$  policy)
3. Calculate and output statistics such as  $H_{sim} = \frac{MaxNumEvents - NumEvents\_WarmUp}{TotalClockTime - ClockTime\_WarmUp}$ .

In the pseudo code, variable  $MaxNumEvents$  holds the total number of events to be detected. Therefore, numbers of suspicious events in warm-up and data collection periods are represented by  $NumEvents\_WarmUp$  and  $(MaxNumEvents - NumEvents\_WarmUp)$ . To minimize the impact of warm-up period and statistical error, we make these two numbers sufficiently large (in the order of  $10^6$ ) so that a large change in either number does not change the final statistics noticeably.  $\square$

## References

Korn, G.A. and Korn, T.M.. 2000. *Mathematical Handbook for Scientists and Engineers*. Dover Publications Inc., Mineola, NY.
